# Supplementary material for: Characterization of Clinical Symptoms by Race Among Women With Early-Stage, Hormone Receptor–Positive Breast Cancer Before Starting Chemotherapy
Source: PubMed Central journal article supplement (PMC8170541; doi:10.1001/jamanetworkopen.2021.12076), 2021-06-01
Supplement: jamanetwopen-e2112076-s001.pdf [file jamanetwopen-e2112076-s001.pdf]

## Supplementary Online Content

Hu X, Chehal PK, Kaplan C, et al. Characterization of clinical symptoms by race among women with early-stage, hormone receptor–positive breast cancer before starting chemotherapy. *JAMA Netw Open*. 2021;4(6):e2112076.  
doi:10.1001/jamanetworkopen.2021.12076

**eFigure.** Sample Selection Flow Chart

**eTable 1.** List of Individual Symptoms Used for Four Compound Scores

**eTable 2.** Patient Characteristics of Medicare Subsample

**eTable 3.** Patient Characteristics of Patients Who Received Surgery Before Chemotherapy and Had a PCM Report Between Surgery and Chemotherapy Initiation

**eTable 4.** Oaxaca Decomposition of Race Differences in Symptom Index Scores of Medicare Subsample

**eTable 5.** Oaxaca Decomposition of Race Differences in Symptom Index Scores of Patients Who Received Surgery Before Chemotherapy and Had a PCM Report Between Surgery and Chemotherapy Initiation

This supplementary material has been provided by the authors to give readers additional information about their work.

**eFigure.** Sample Selection Flow Chart

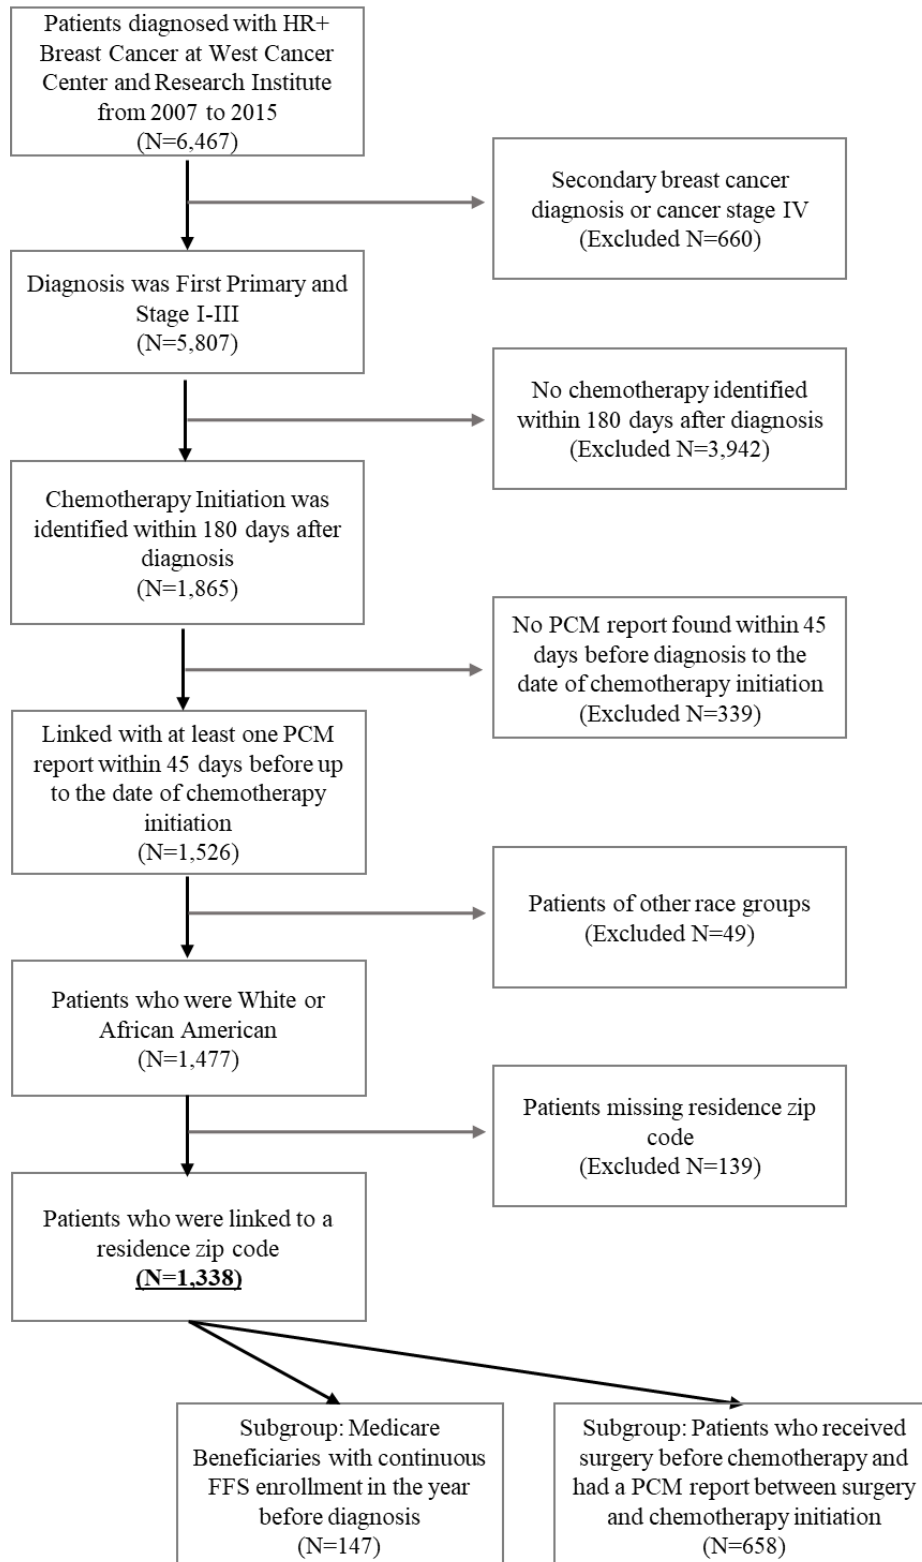

**eTable 1.** List of Individual Symptoms Used for Four Compound Scores

| Compound Score         | General Physical Symptoms                             | Treatment Adverse Effects                                  | Acute Distress                       | Despair                                                            |
|------------------------|-------------------------------------------------------|------------------------------------------------------------|--------------------------------------|--------------------------------------------------------------------|
| <b>Individual Item</b> | 1. Fatigue, tiredness, or weakness                    | 1. Change in weight                                        | 1. I cry a lot or feel like crying   | 1. I feel hopeless                                                 |
|                        | 2. Rash or dry skin or itching                        | 2. Hair loss                                               | 2. I am worried                      | 2. I have lost interest in people that I used to want to be around |
|                        | 3. Trouble focusing or concentrating                  | 3. Nausea or vomiting                                      | 3. I feel nervous, tense, or anxious | 3. I feel helpless                                                 |
|                        | 4. Daytime sleepiness                                 | 4. Dry mouth                                               | 4. I am sad or depressed             | 4. I think I would be better off dead                              |
|                        | 5. Physical pain                                      | 5. Change in the taste of food                             |                                      | 5. I feel guilty                                                   |
|                        | 6. Sweating                                           | 6. Trouble with bowel movements (diarrhea or constipation) |                                      | 6. I have lost interest in things that I used to want to do        |
|                        | 7. Trouble breathing or coughing                      | 7. Sore throat or trouble swallowing                       |                                      | 7. I feel worthless                                                |
|                        | 8. Reduced sexual enjoyment, interest, or performance | 8. Change in appetite                                      |                                      |                                                                    |
|                        | 9. Trouble sleeping                                   |                                                            |                                      |                                                                    |
|                        | 10. Problems with urination                           |                                                            |                                      |                                                                    |
|                        | 11. Numbness or tingling                              |                                                            |                                      |                                                                    |

**eTable 2.** Patient Characteristics of Medicare Subsample

| Characteristics                                                  | Patients, No. (%)   |                     |                     | P Value <sup>a</sup> |
|------------------------------------------------------------------|---------------------|---------------------|---------------------|----------------------|
|                                                                  | Total (N=147)       | Black (n=32)        | White (n=115)       |                      |
| Age, y                                                           |                     |                     |                     |                      |
| Mean (SD)                                                        | 70.8 (8.5)          | 65.3 (11.1)         | 72.3 (6.9)          | 0.001                |
| Median (IQR)                                                     | 71.0 (69.0- 76.0)   | 69.0 (57.5- 72.5)   | 72.0 (69.0- 77.0)   |                      |
| Stage at diagnosis                                               |                     |                     |                     | 0.81                 |
| Stage I                                                          | 40 (27.2%)          | 9 (28.1%)           | 31 (27.0%)          |                      |
| Stage II                                                         | 67 (45.6%)          | 13 (40.6%)          | 54 (47.0%)          |                      |
| Stage III                                                        | 40 (27.2%)          | 10 (31.3%)          | 30 (26.1%)          |                      |
| Comorbidities                                                    |                     |                     |                     | 0.26                 |
| No comorbidity                                                   | 56 (38.1%)          | 11 (34.4%)          | 45 (39.1%)          |                      |
| One comorbidity                                                  | 44 (29.9%)          | 7 (21.9%)           | 37 (32.2%)          |                      |
| More than 1 comorbidity                                          | 47 (32.0%)          | 14 (43.8%)          | 33 (28.7%)          |                      |
| Household income at the neighborhood level, \$                   |                     |                     |                     |                      |
| Mean (SD)                                                        | 48643 (23271)       | 31170 (14984)       | 53505 (22868)       | <.001                |
| Median (IQR)                                                     | 40221 (32531-64209) | 29193 (25989-34128) | 50701 (34072-64582) | <.001                |
| Adults with high school degree at the neighborhood level, %      |                     |                     |                     |                      |
| Mean (SD)                                                        | 82.5 (9.1)          | 74.6 (7.0)          | 84.7 (8.4)          | <.001                |
| Median (IQR)                                                     | 82.7 (75.6- 90.7)   | 75.6 (70.6- 76.8)   | 86.0 (77.8- 91.5)   | <.001                |
| State of residence                                               |                     |                     |                     | 0.61                 |
| Arkansas                                                         | 7 (4.8%)            | 1 (3.1%)            | 6 (5.2%)            |                      |
| Mississippi                                                      | 55 (37.4%)          | 15 (46.9%)          | 40 (34.8%)          |                      |
| Tennessee                                                        | 82 (55.8%)          | 16 (50.0%)          | 66 (57.4%)          |                      |
| Other                                                            | 3 (2.0%)            | 0 (0.0%)            | 3 (2.6%)            |                      |
| Time between survey and chemotherapy initiation, mean (SD), d    | 6.7 (9.9)           | 5.6 (8.9)           | 7.0 (10.2)          | 0.51                 |
| Time between diagnosis and chemotherapy initiation, mean (SD), d | 69.2 (34.3)         | 65.3 (41.7)         | 70.3 (32.1)         | 0.47                 |
| Any Severity Symptoms, mean (SD), No.                            | 12.5 (10.0)         | 12.4 (10.8)         | 12.5 (9.8)          | 0.97                 |

Abbreviation: IQR=Interquartile Range; SD=Standard Deviation

<sup>a</sup> The t test was used for mean comparisons, the Wilcoxon rank-sum test was used for median comparisons, and the  $\chi^2$  test or the Fisher exact test 2 were used for categorical measures

**eTable 3.** Patient Characteristics of Patients Who Received Surgery Before Chemotherapy and Had a PCM Report Between Surgery and Chemotherapy Initiation

| Characteristics                                                  | Patients, No. (%)   |                     |                     | P Value <sup>a</sup> |
|------------------------------------------------------------------|---------------------|---------------------|---------------------|----------------------|
|                                                                  | Total (N=658)       | Black (n=210)       | White (n=448)       |                      |
| Age, y                                                           |                     |                     |                     |                      |
| Mean (SD)                                                        | 56.2 (11.9)         | 53.0 (10.8)         | 57.7 (12.1)         | <.001                |
| Median (IQR)                                                     | 56.0 (48.0, 65.0)   | 53.0 (46.0, 61.0)   | 57.0 (49.0, 67.0)   | <.001                |
| Stage at diagnosis                                               |                     |                     |                     | 0.075                |
| Stage I                                                          | 238 (36.2%)         | 63 (30.0%)          | 175 (39.1%)         |                      |
| Stage II                                                         | 304 (46.2%)         | 105 (50.0%)         | 199 (44.4%)         |                      |
| Stage III                                                        | 116 (17.6%)         | 42 (20.0%)          | 74 (16.5%)          |                      |
| Household income at the neighborhood level, \$                   |                     |                     |                     |                      |
| Mean (SD)                                                        | 52432 (23790)       | 41177 (18923)       | 57708 (24021)       | <.001                |
| Median (IQR)                                                     | 48234 (33295-64985) | 34128 (29066-51295) | 51656 (36993-70541) | <.001                |
| Adults with high school degree at the neighborhood level, %      |                     |                     |                     |                      |
| Mean (SD)                                                        | 84.6 (9.0)          | 81.0 (8.5)          | 86.3 (8.7)          | <.001                |
| Median (IQR)                                                     | 86.0 (76.9-92.8)    | 79.6 (75.6-87.1)    | 87.2 (79.7-94.3)    | <.001                |
| State or residence                                               |                     |                     |                     | <.001                |
| Arkansas                                                         | 25 (3.8%)           | 5 (2.4%)            | 20 (4.5%)           |                      |
| Mississippi                                                      | 170 (25.8%)         | 34 (16.2%)          | 136 (30.4%)         |                      |
| Tennessee                                                        | 446 (67.8%)         | 170 (81.0%)         | 276 (61.6%)         |                      |
| Other                                                            | 17 (2.6%)           | 1 (0.5%)            | 16 (3.6%)           |                      |
| Time between survey and chemotherapy initiation, Mean (SD), d    | 5.9 (8.6)           | 6.0 (8.8)           | 5.8 (8.5)           | 0.73                 |
| Time between diagnosis and chemotherapy initiation, mean (SD), d | 73.7 (28.9)         | 79.5 (31.4)         | 71.1 (27.2)         | 0.001                |
| Time between surgery and survey, mean (SD), d                    | 42.1 (25.5)         | 45.5 (27.2)         | 40.5 (24.5)         | 0.019                |
| Any Severity Symptoms, mean (SD), No.                            | 11.7 (9.3)          | 12.0 (9.5)          | 11.6 (9.2)          | 0.61                 |

Abbreviation: IQR=Interquartile Range; SD=Standard Deviation

<sup>a</sup> The t test was used for mean comparisons, the Wilcoxon rank-sum test was used for median comparisons, and the  $\chi^2$  test or the Fisher exact test 2 were used for categorical measures

**eTable 4.** Oaxaca Decomposition of Race Differences in Symptom Index Scores of Medicare Subsample

| Symptom Index Scores                             | Patients, No. | Unadjusted mean (SE) composite score <sup>a</sup> |                         | Crude net Difference (SE) in mean scores <sup>a</sup> | Explained Difference (SE) <sup>a</sup> | Unexplained Difference (SE) <sup>a</sup> |
|--------------------------------------------------|---------------|---------------------------------------------------|-------------------------|-------------------------------------------------------|----------------------------------------|------------------------------------------|
|                                                  |               | White patients                                    | Black patients          |                                                       |                                        |                                          |
| <b>(A) Without Controlling for Comorbidities</b> |               |                                                   |                         |                                                       |                                        |                                          |
| General Physical Symptoms                        | 147           | 44.6 (0.7) <sup>b</sup>                           | 43.7 (1.7) <sup>b</sup> | 0.9 (1.8)                                             | -3.3 (1.3) <sup>b</sup>                | 4.2 (2.2)                                |
| Treatment Adverse Effects                        | 146           | 44.5 (0.5) <sup>b</sup>                           | 45.2 (1.2) <sup>b</sup> | -0.8 (1.3)                                            | -1.0 (0.9)                             | 0.2 (1.6)                                |
| Acute Distress                                   | 105           | 49.3 (1.3) <sup>b</sup>                           | 45.7 (2.1) <sup>b</sup> | 3.6 (2.5)                                             | -3.3 (2.4)                             | 6.9 (3.5) <sup>b</sup>                   |
| Despair                                          | 73            | 47.3 (1.2) <sup>b</sup>                           | 46.5 (1.9) <sup>b</sup> | 0.8 (2.2)                                             | -6.1 (2.9) <sup>b</sup>                | 6.9 (3.7)                                |
| <b>(B) Controlling for Comorbidities</b>         |               |                                                   |                         |                                                       |                                        |                                          |
| General Physical Symptoms                        | 147           | 44.6 (0.7) <sup>b</sup>                           | 43.7 (1.7) <sup>b</sup> | 0.9 (1.9)                                             | -3.8 (1.4) <sup>b</sup>                | 4.7 (2.2) <sup>b</sup>                   |
| Treatment Adverse Effects                        | 146           | 44.5 (0.5) <sup>b</sup>                           | 45.2 (1.2) <sup>b</sup> | -0.8 (1.3)                                            | -1.4 (1.1)                             | 0.6 (1.7)                                |
| Acute Distress                                   | 105           | 49.3 (1.3) <sup>b</sup>                           | 45.7 (2.2) <sup>b</sup> | 3.6 (2.5)                                             | -3.3 (2.5)                             | 6.9 (3.6)                                |
| Despair                                          | 73            | 47.3 (1.2) <sup>b</sup>                           | 46.5 (2.0) <sup>b</sup> | 0.8 (2.3)                                             | -6.4 (3.1) <sup>b</sup>                | 7.2 (3.9)                                |

<sup>a</sup> Robust SEs in parentheses. Analysis controlled for all covariates in the whole sample analysis as well as comorbidities (in panel B).

<sup>b</sup>  $P < 0.05$

**eTable 5.** Oaxaca Decomposition of Race Differences in Symptom Index Scores of Patients Who Received Surgery Before Chemotherapy and Had a PCM Report Between Surgery and Chemotherapy Initiation

| Symptom Index Scores                                           | Patients, No. | Unadjusted mean (SE) composite score <sup>a</sup> |                         | Crude net Difference (SE) in mean scores <sup>a</sup> | Explained Difference (SE) <sup>a</sup> | Unexplained Difference (SE) <sup>a</sup> |
|----------------------------------------------------------------|---------------|---------------------------------------------------|-------------------------|-------------------------------------------------------|----------------------------------------|------------------------------------------|
|                                                                |               | White patients                                    | Black patients          |                                                       |                                        |                                          |
| <b>(C) Without Controlling for Days from Surgery to Survey</b> |               |                                                   |                         |                                                       |                                        |                                          |
| General Physical Symptoms                                      | 658           | 44.7 (0.4) <sup>b</sup>                           | 44.5 (0.6) <sup>b</sup> | 0.1 (0.7)                                             | -1.6 (0.5) <sup>b</sup>                | 1.7 (0.9) <sup>b</sup>                   |
| Treatment Adverse Effects                                      | 658           | 43.7 (0.2) <sup>b</sup>                           | 44.7 (0.4) <sup>b</sup> | -0.9 (0.4) <sup>b</sup>                               | -0.6 (0.3) <sup>b</sup>                | -0.3 (0.5)                               |
| Acute Distress                                                 | 513           | 50.9 (0.6) <sup>b</sup>                           | 48.3 (0.9) <sup>b</sup> | 2.6 (1.1) <sup>b</sup>                                | -2.5 (0.7) <sup>b</sup>                | 5.0 (1.3) <sup>b</sup>                   |
| Despair                                                        | 396           | 48.4 (0.5) <sup>b</sup>                           | 47.8 (0.7) <sup>b</sup> | 0.7 (0.9)                                             | -2.0 (0.6) <sup>b</sup>                | 2.7 (1.1) <sup>b</sup>                   |
| <b>(D) Controlling for Days from Surgery to Survey</b>         |               |                                                   |                         |                                                       |                                        |                                          |
| General Physical Symptoms                                      | 658           | 44.7 (0.4) <sup>b</sup>                           | 44.5 (0.6) <sup>b</sup> | 0.1 (0.7)                                             | -1.6 (0.5) <sup>b</sup>                | 1.7 (0.9) <sup>b</sup>                   |
| Treatment Adverse Effects                                      | 658           | 43.7 (0.2) <sup>b</sup>                           | 44.7 (0.4) <sup>b</sup> | -0.9 (0.4) <sup>b</sup>                               | -0.6 (0.3) <sup>b</sup>                | -0.3 (0.5)                               |
| Acute Distress                                                 | 513           | 50.9 (0.6) <sup>b</sup>                           | 48.3 (0.9) <sup>b</sup> | 2.6 (1.1) <sup>b</sup>                                | -2.4 (0.7) <sup>b</sup>                | 5.0 (1.3) <sup>b</sup>                   |
| Despair                                                        | 396           | 48.4 (0.5) <sup>b</sup>                           | 47.8 (0.8) <sup>b</sup> | 0.7 (0.9)                                             | -2.0 (0.6) <sup>b</sup>                | 2.7 (1.1) <sup>b</sup>                   |

<sup>a</sup> Robust SEs in parentheses. Analysis controlled for all covariates in the whole sample analysis as well as time from surgery to survey (in panel D).

<sup>b</sup>  $P < 0.05$
